# Supplementary material
Source: PubMed Central journal article supplement (PMC3307303)
Supplement: supp_M111.309526_jbc.M111.309526-1.pdf [file supp_M111.309526_jbc.M111.309526-1.pdf]

**JBC (2011)**

**SUPPLEMENTAL INFORMATION (1 table and 2 figures)**

**Definition of the Client-Binding Domain and the Substrate Specificity of gp96 (HSP90b1, GRP94) in Chaperoning Toll-Like Receptors And Integrins**

**Shuang Wu *et al.***

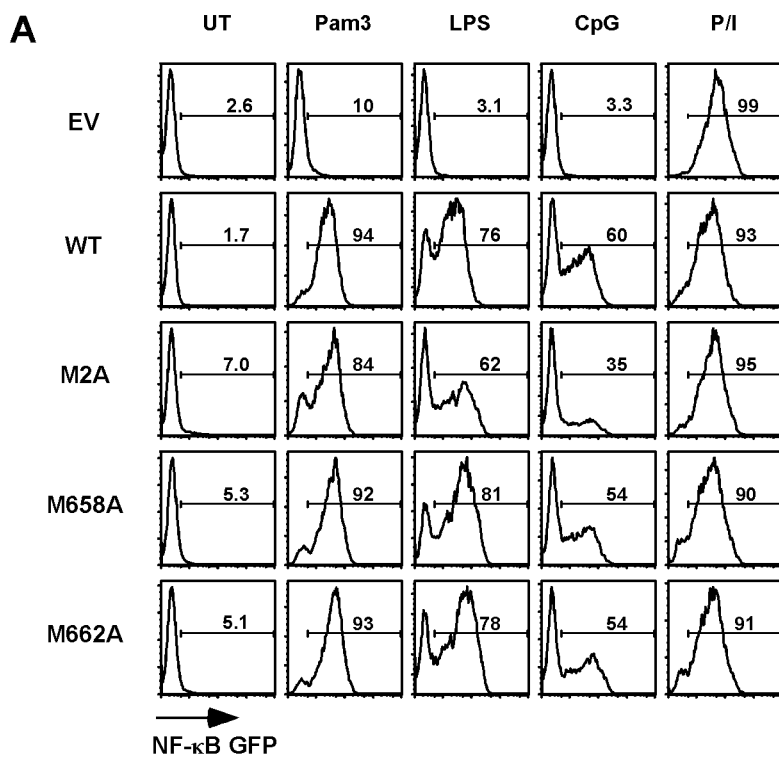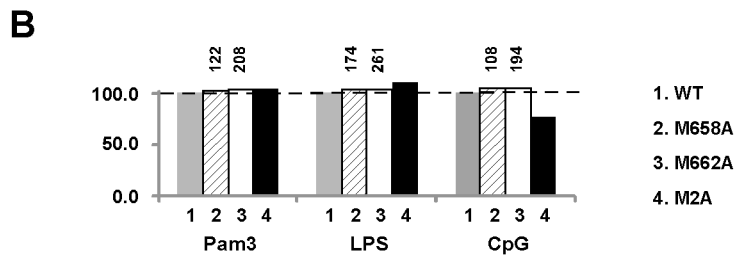

**Figure S1. Cells with Met mutants of gp96 are fully responsive to TLR stimulation.** *A*, NF $\kappa$ B-GFP activation after overnight (16-18hr) stimulation with nothing (UT), PMA/ionomycin (P/I) or various TLR ligands. Pam3CSK4, LPS, CpG, PMA/ionomycin concentration were described in methods section. Numbers refer to percentage of GFP-positive cells. *B*, Quantification of the mean fluorescence intensity (MFI) of NF $\kappa$ B-GFP reporter activation in *A*.

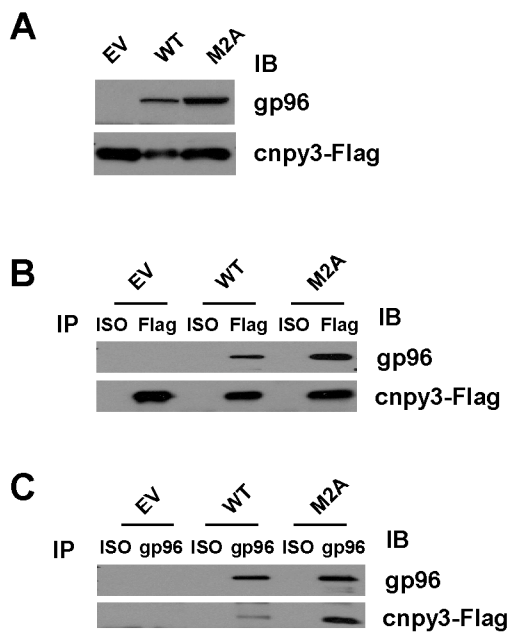

**Figure S2. M2A mutant can still interact with co-chaperone cnp3.** *A*, Expression of gp96 mutants and cnp3-Flag in transduced gp96-null E4.126 cells. *B*, IP of cnp3-Flag followed by IB for cnp3-Flag or gp96. *C*, IP of gp96 followed by IB for cnp3-Flag or gp96.

**Table S1. Primers used for generating gp96 mutants.**

| Mutants | Primer sequences                                                                                                                                                                                                                                                       |
|---------|------------------------------------------------------------------------------------------------------------------------------------------------------------------------------------------------------------------------------------------------------------------------|
| ΔCBD    | N-piece Forward: 5'-ggaagatctgccaccatgagggctctgtgg-3'<br>Reverse: 5'-tttgaacgttttctttgactggcctgactggcacaagagcacagga-3'<br>C-piece Forward: 5'-tccctgtgctctgtggcagtcaggccagtcaaaagaaaacgttcgaaa-3'<br>Reverse: 5'-cacacgggattcatagcgaga-3'                              |
| AA1     | 1st set Forward: 5'-ctctgtggcagtcagatcatgaaggcacaagc-3'<br>Reverse: 5'-gcttgtgcctcatgatctgactggcacaagag-3'<br>2nd set Forward: 5'-ctctgtggcagtcagatgcagcgtctgccgcccggcgatcatgaaggcacaagc-3'<br>Reverse: 5'-gcttgtgcctcatgatcgccgcccggcgagacgctgcatactgactggcacaagag-3' |
| AA2     | Forward: 5'-gcacaagcatagcgcagggcaaggccatctctacaaatgccgtgccagtcaaaag-3'<br>Reverse: 5'-ctttgactggcagcggcattttagagatggccttgcccgtcgcgtatgcttgtgc-3'                                                                                                                       |
| M2A     | Forward: 5'-atggatggtctggcaacgcggagaggatcgcaaggcacaagcatacc-3'<br>Reverse: 5'-ggtatgcttgtgccttcgcatcctctccgcttgccagaccatccat-3'                                                                                                                                        |
| M658A   | Forward: 5'-tatggatggtctggcaacgcggagaggatcatgaaggc-3'<br>Reverse: 5'-gccttcatgatcctctccgcttgccagaccatccata-3'                                                                                                                                                          |
| M662A   | Forward: 5'-ggcaacatggagaggatcgcaaggcacaagcatacca-3'<br>Reverse: 5'-tggatgcttgtgccttcgcatcctctccatgttgc-3'                                                                                                                                                             |
| NTD+CBD | Forward: 5'-atagcggccgcccaccatgagggctctgtg-3'<br>Reverse: 5'-tatgcccgccttacttatcgctcatccttgtaatcatagtaattgtagagatgt-3'                                                                                                                                                 |
| NTDΔCBD | Forward: same as NTD+CBD<br>Reverse: 5'-tatgcccgccttacttatcgctcatccttgtaatcctgactggcacaagagcaca-3'                                                                                                                                                                     |
| CTD+CBD | 1st rd Forward:<br>5'-cctgctgacctcggggtcgtcagagctgattacaaggatgacgacgataagtatggatggtctggcaacatg-3'<br>2nd set Forward:<br>5'-atagcggccgcccaccatgagggctctgtgggtgttggcctctgctgtgtcctgctgacctcgggttcg-3'<br>Reverse: 5'-atagcggccgcacacgggattcatagcgaga-3'                 |
| CTDΔCBD | 1st rd Forward:<br>5'-cctgctgacctcggggtcgtcagagctgattacaaggatgacgacgataaggccagtcaaaagaaaacgttc-3'<br>2nd set Forward: same as CTD+CBD<br>Reverse: same as CTD+CBD                                                                                                      |
